# Supplementary material for: Left atrial wall shear stress distribution correlates with atrial endocardial electrogram voltage and fibrosis in patients with atrial fibrillation
Source: bioRxiv or medRxiv preprint supplement (doi:10.1101/2024.07.11.24310174), 2024-07-12

# **Left atrial wall shear stress distribution correlates with atrial endocardial electrogram voltage and fibrosis in patients with atrial fibrillation**

*Dionysios Adamopoulos<sup>1,2,3\*</sup>, Georgios Rovas<sup>4\*</sup>, Nicolas Johner<sup>1</sup>, Hajo Müller<sup>1,2</sup>, Jean-François Deux<sup>5</sup>, Lindsey A. Crowe<sup>5</sup>, Jean-Paul Vallée<sup>5</sup>, François Mach<sup>1,2</sup>, Nikolaos Stergiopoulos<sup>4</sup>, Dipen Shah<sup>1,2</sup>*

*1: Department of Internal Medicine, Division of Cardiology, Hôpitaux Universitaires de Genève, 1205 Geneva, Switzerland.*

*2: Faculty of Medicine, Department of Medicine, Geneva University, 1206 Geneva, Switzerland.*

*3: Department of Diagnostics, Division of Nuclear Medicine, Hôpitaux Universitaires de Genève, 1205 Geneva, Switzerland*

*4: Laboratory of Hemodynamics and Cardiovascular Technology, Ecole Polytechnique Fédérale de Lausanne, 1015 Lausanne, Switzerland.*

*5: Department of Diagnostics, Division of Radiology, Hôpitaux Universitaires de Genève, 1205 Geneva, Switzerland.*

*\* Both authors equally contributed to the study.*

## **Corresponding Author:**

*Dr. Georgios Rovas*

*EPFL STI IBI-STI LHTC*

*MED 3 2923 (Bâtiment MED) Station 9*

*1015 Lausanne*

*Switzerland*

*Tel: +41 21 693 87 66*

*Email: [georgios.rovas@epfl.ch](mailto:georgios.rovas@epfl.ch)*

## Supplementary Results

**Supplementary Figure 1.** Pearson's correlation coefficient heatmap between the bipolar voltage and the calculated hemodynamic indices of each subject. The 3D electro-anatomical map of subjects 2, 3, 5, 9, 10, 11 and 14 were obtained in atrial fibrillation.

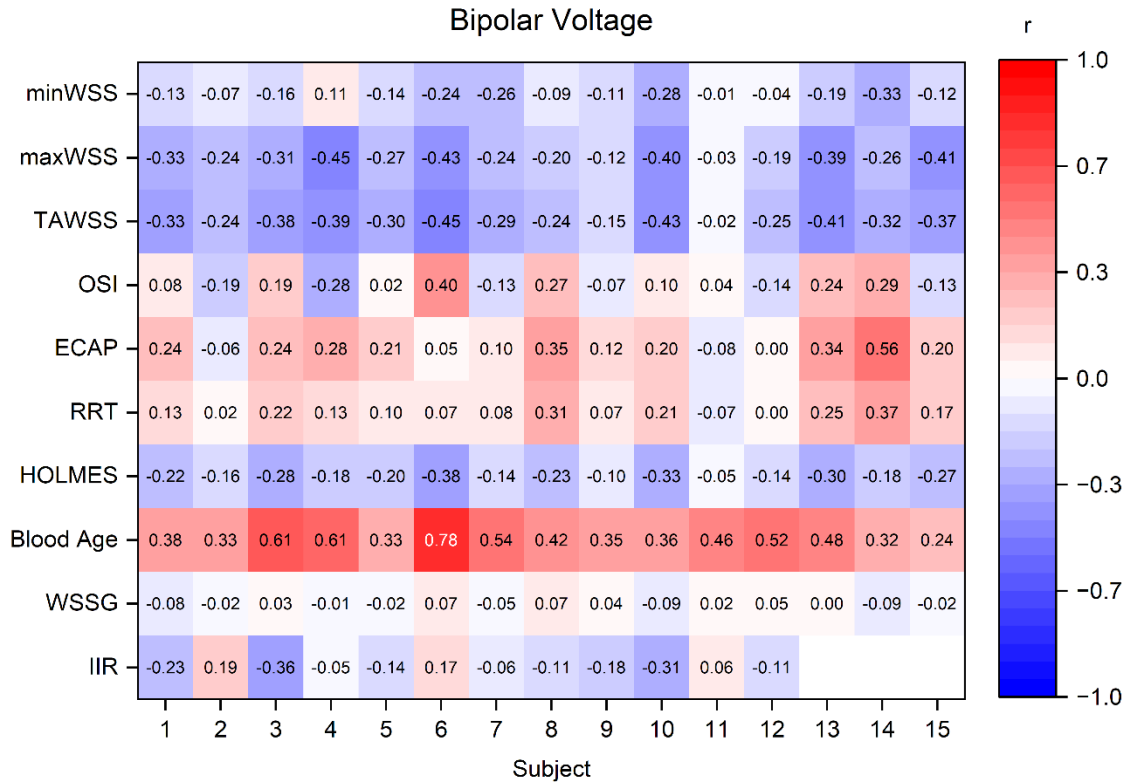

**Supplementary Figure 2.** Pearson's correlation coefficient heatmap between the image intensity ratio and the calculated hemodynamic indices of each subject.

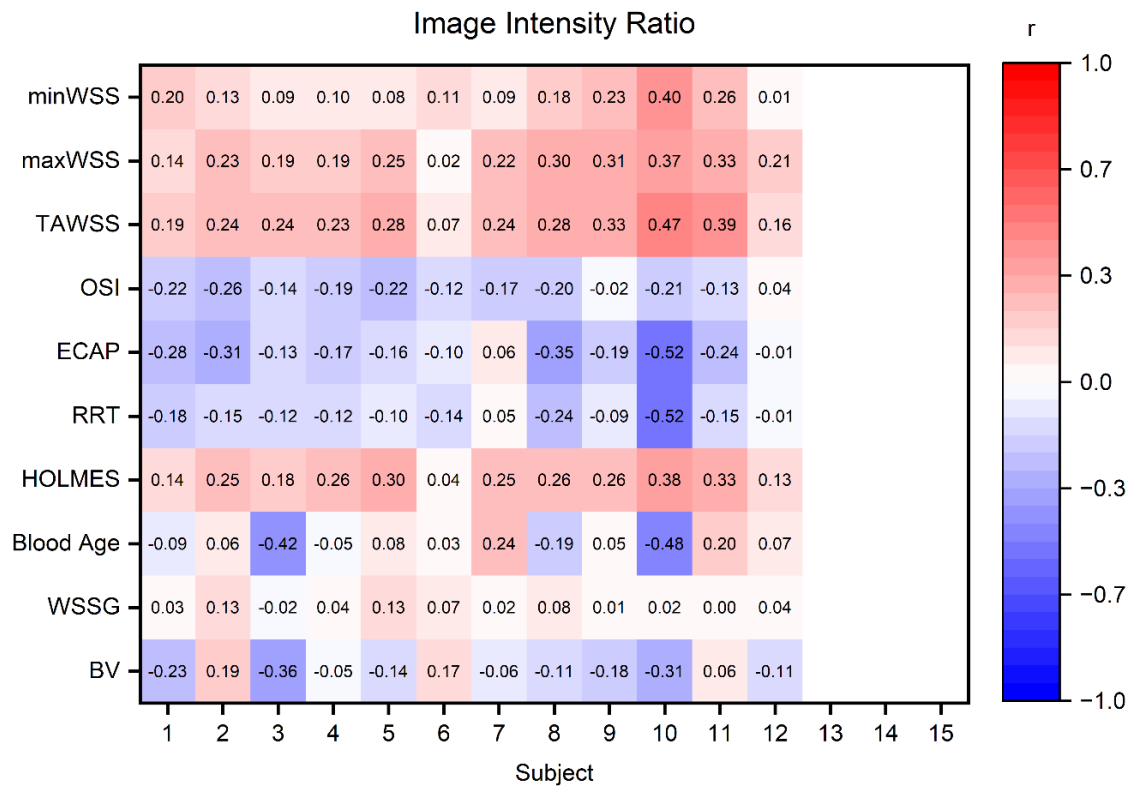

**Supplementary Figure 3.** The 2D maps of the distribution of the time-averaged wall shear stress (TAWSS), bipolar voltage (BV), blood age (BA) and Image Intensity Ratio (IIR) for each subject. The colormap corresponds to healthy regions (black-gray), regions with interstitial fibrosis (white) and fibrotic regions (red). LGE-CMR acquisitions were not available for subjects 13–15.

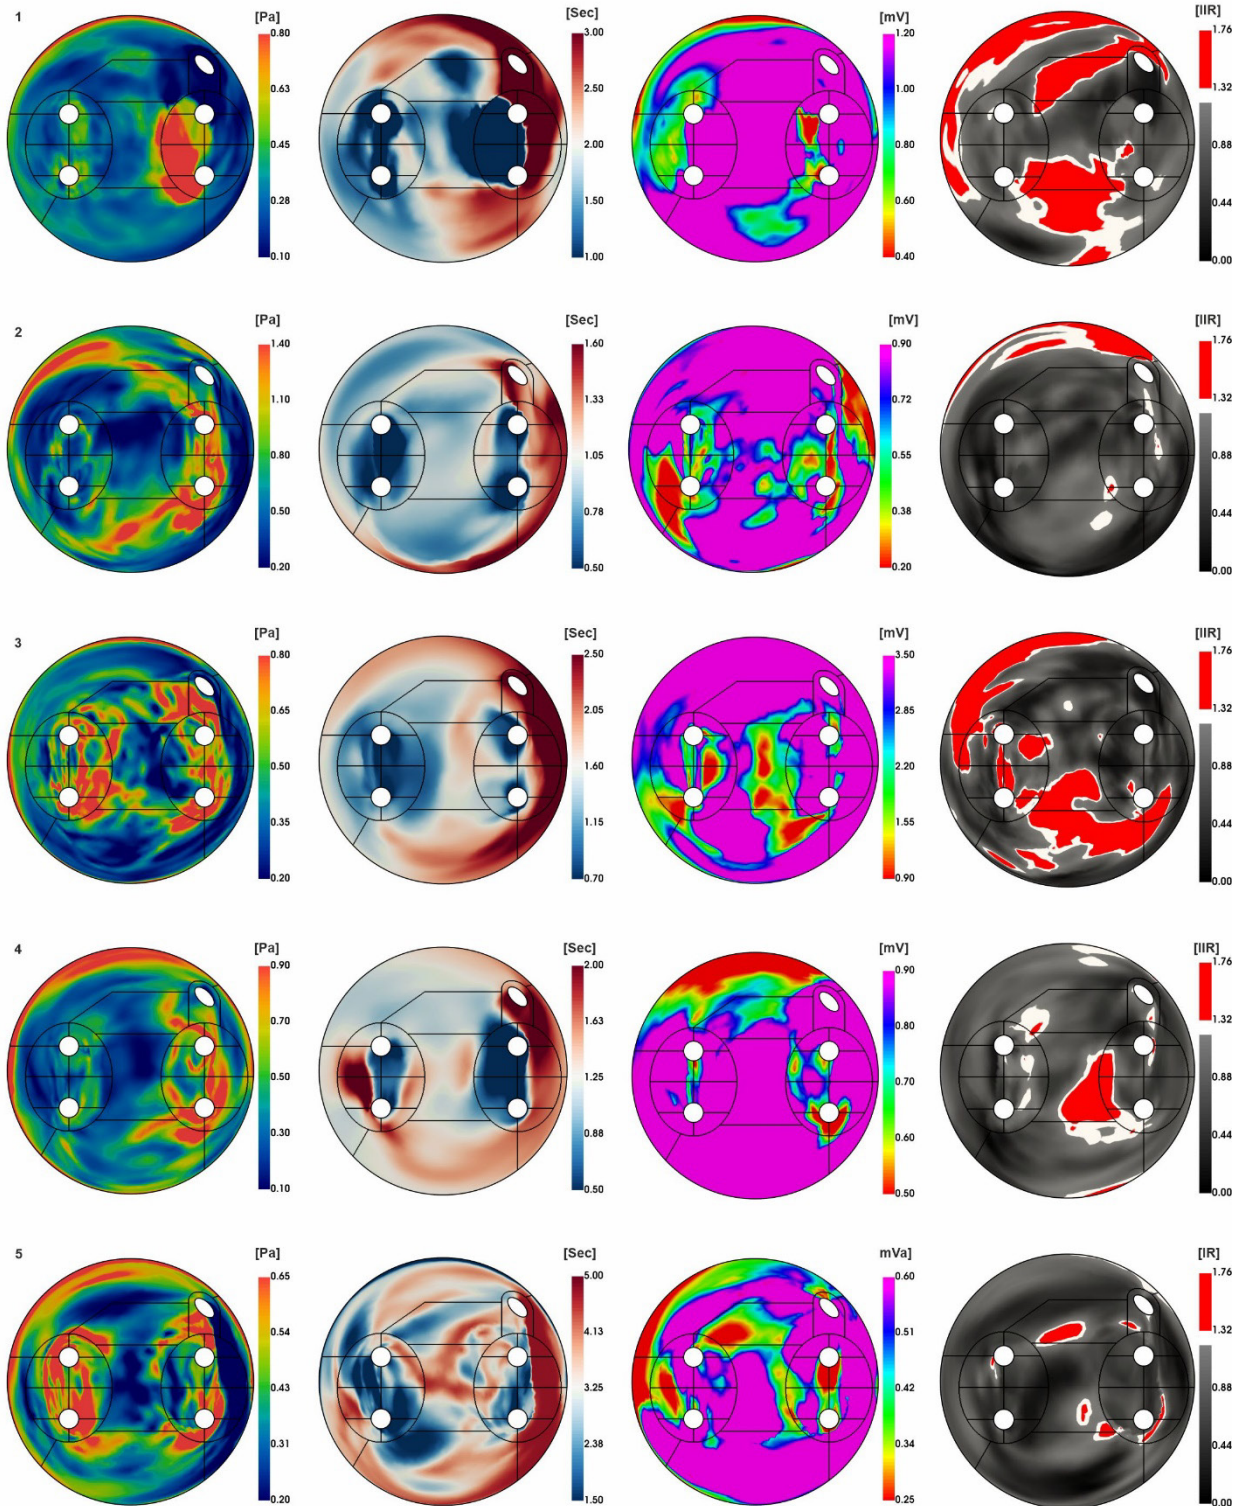



**Supplementary Figure 3 (continued).** The 2D maps of the distribution of the time-averaged wall shear stress (TAWSS), bipolar voltage (BV), blood age (BA) and Image Intensity Ratio (IIR) for each subject. The colormap corresponds to healthy regions (black-gray), regions with interstitial fibrosis (white) and fibrotic regions (red). LGE-CMR acquisitions were not available for subjects 13–15.

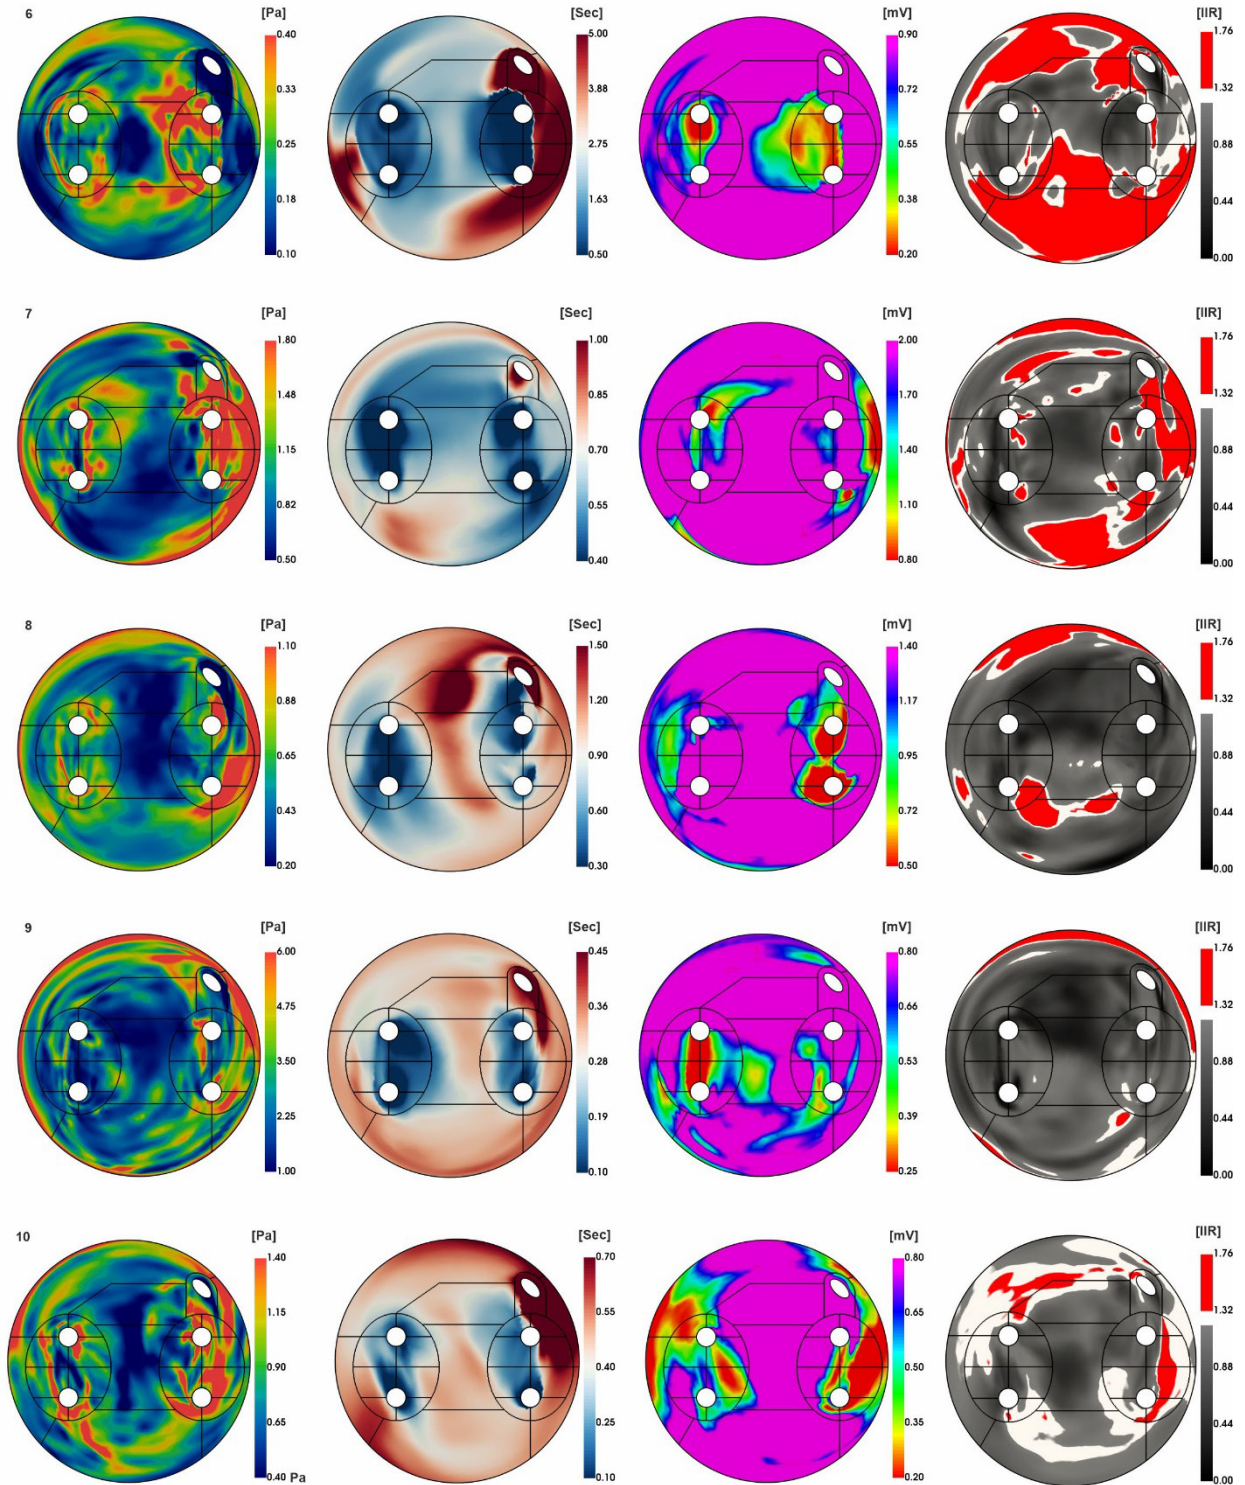

**Supplementary Figure 3 (continued).** The 2D maps of the distribution of the time-averaged wall shear stress (TAWSS), bipolar voltage (BV), blood age (BA) and Image Intensity Ratio (IIR) for each subject. The colormap corresponds to healthy regions (black-gray), regions with interstitial fibrosis (white) and fibrotic regions (red). LGE-CMR acquisitions were not available for subjects 13–15.

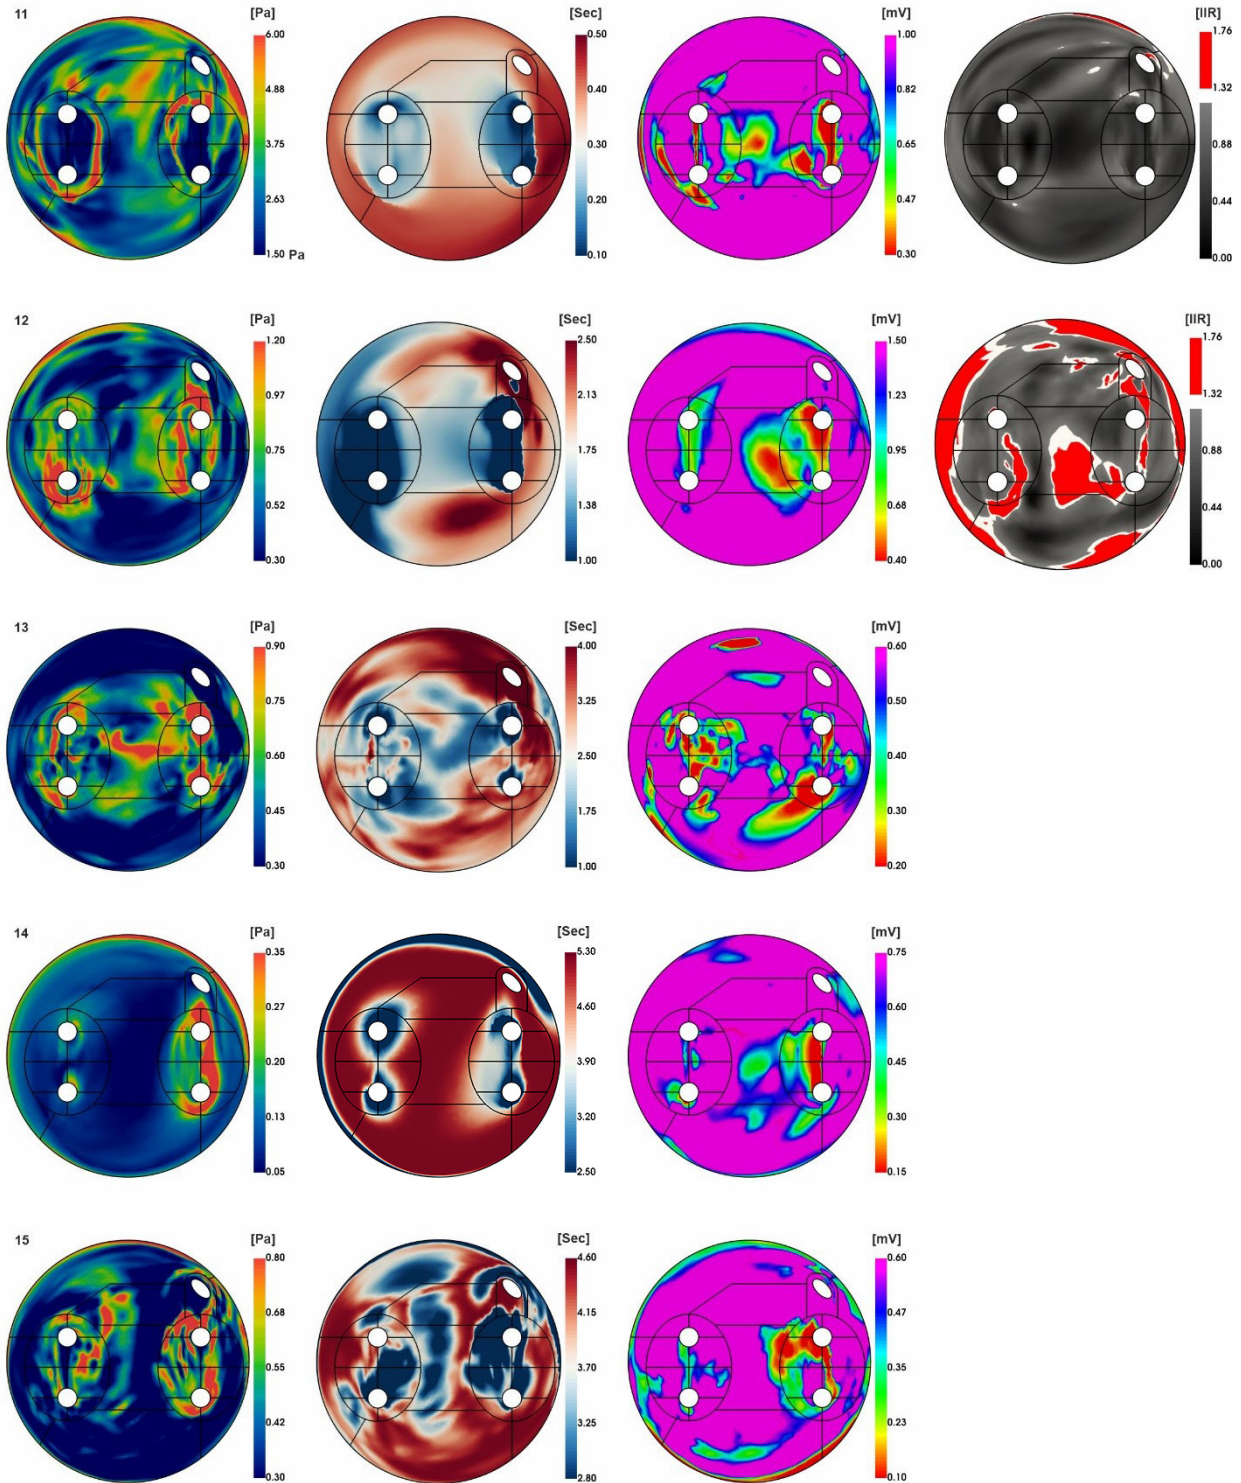

Supplement: Supplementary file [file media-1.pdf]
